# Supplementary material for: Catalyst-free synthesis of tungsten oxide nanowires via thermal evaporation for fast-response electrochromic devices
Source: Royal Society of Chemistry journal article supplement (doi:10.1039/d2ce01269c), 2022-01-01
Supplement: d2ce01269c3.pdf [file d2ce01269c3.pdf]

Electronic Supplementary Material (ESI) for CrystEngComm.  
This journal is © The Royal Society of Chemistry 2022
