# Supplementary figures and images for: Catalyst-free synthesis of tungsten oxide nanowires via thermal evaporation for fast-response electrochromic devices
Source: Royal Society of Chemistry journal article supplement (doi:10.1039/d2ce01269c), 2022-01-01

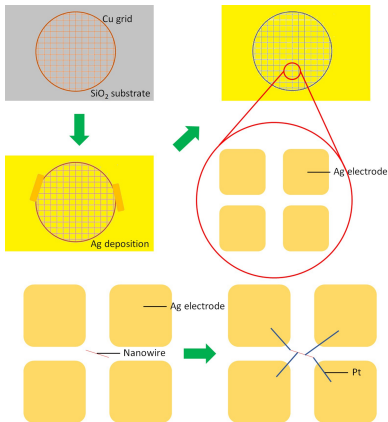

Supplement: d2ce01269c2.pdf [file d2ce01269c2.pdf]
